# Supplementary material for: Missing covariates in competing risks analysis
Source: PubMed Central journal article supplement (PMC5031948; doi:10.1093/biostatistics/kxw019), 2016-05-13
Supplement: supp_kxw019_kxw019supp.pdf [file supp_kxw019_kxw019supp.pdf]

*Biostatistics* (2016), **0**, 0, pp. **1–12**  
doi:10.1093/biostatistics/supp-materials-2016-04-01

# Missing covariates in competing risks analysis Supplementary Materials

JONATHAN W. BARTLETT\*

*Statistical Innovation Group, AstraZeneca, Riverside 2, Granta Park, Cambridge, CB21 6GP,*

*UK*

jwb133@googlemail.com

JEREMY M.G. TAYLOR

*Department of Biostatistics, School of Public Health, University of Michigan, MI, Ann Arbor,*

*U.S.A.*

## APPENDIX

## A. VALIDITY OF COMPLETE CASE ANALYSIS

Without loss of generality, we consider the cause specific hazard function for the first cause in the complete cases,  $h_1(t|X, Z, R = 1)$ . This is equal to

$$\begin{aligned}
& \lim_{h \rightarrow 0} \frac{1}{h} P(t \leq Y < t + h, D = 1 | R = 1, X, Z, Y \geq t) \\
&= \lim_{h \rightarrow 0} \frac{1}{h} \frac{P(t \leq T < t + h, D^* = 1, C \geq t, R = 1 | X, Z)}{P(R = 1, T \geq t, C \geq t | X, Z)} \\
&= \lim_{h \rightarrow 0} \frac{1}{h} \frac{P(t \leq T < t + h, D^* = 1, C \geq t | X, Z)}{P(T \geq t, C \geq t | X, Z)} \times \frac{P(R = 1 | t \leq T < t + h, D^* = 1, C \geq t, X, Z)}{P(R = 1 | T \geq t, C \geq t, X, Z)} \\
&= \lim_{h \rightarrow 0} \frac{1}{h} \frac{P(t \leq T < t + h, D^* = 1 | X, Z) P(C \geq t | X, Z)}{P(T \geq t | X, Z) P(C \geq t | X, Z)} \times \frac{P(R = 1 | T = t, D^* = 1, C \geq t, X, Z)}{P(R = 1 | T \geq t, C \geq t, X, Z)} \\
&= \lim_{h \rightarrow 0} \frac{1}{h} \frac{P(t \leq T < t + h, D^* = 1 | X, Z)}{P(T \geq t | X, Z)} \times \frac{P(R = 1 | T = t, D^* = 1, C \geq t, X, Z)}{P(R = 1 | T \geq t, C \geq t, X, Z)} \\
&= h_1(t | X, Z) \times \frac{P(R = 1 | T = t, D^* = 1, C \geq t, X, Z)}{P(R = 1 | T \geq t, C \geq t, X, Z)} \tag{A.1}
\end{aligned}$$

A complete case analysis will thus give valid inferences when the second term in the preceding equation is equal to one. An obvious sufficient condition for this to hold is that missingness is covariate dependent, in the sense that  $R \perp\!\!\!\perp (T, D^*, C) | (X, Z)$ .

We now show that a weaker sufficient condition is that  $R \perp\!\!\!\perp (T, D^*) | (C, X, Z)$ , which permits missingness to depend on the time to censoring  $C$ , in addition to  $X$  and  $Z$ . To this end, we first show that under this assumption censoring remains independent in the complete cases ( $(T, D^*) \perp\!\!\!\perp C | (X, Z, R = 1)$ ), utilizing the assumption that  $(T, D^*) \perp\!\!\!\perp C | (X, Z)$ :

$$\begin{aligned}
P(T, D^*, C | X, Z, R = 1) &= \frac{P(T, D^*, C, R = 1 | X, Z)}{P(R = 1 | X, Z)} \\
&= \frac{P(R = 1 | T, D^*, C, X, Z) P(T, D^*, C | X, Z)}{P(R = 1 | X, Z)} \\
&= \frac{P(R = 1 | C, X, Z) P(T, D^* | X, Z) P(C | X, Z)}{P(R = 1 | X, Z)} \\
&= P(T, D^* | X, Z) P(C | X, Z, R = 1)
\end{aligned}$$

Using these results we then have that the second term in equation (A.1) is equal to

$$\begin{aligned}
\frac{P(R = 1|T = t, D^* = 1, C \geq t, X, Z)}{P(R = 1|T \geq t, C \geq t, X, Z)} &= \frac{\frac{P(T=t, D^*=1, C \geq t|X, Z, R=1)P(R=1|X, Z)}{P(T=t, D^*=1, C \geq t|X, Z)}}{\frac{P(T \geq t, C \geq t|X, Z, R=1)P(R=1|X, Z)}{P(T \geq t, C \geq t|X, Z)}} \\
&= \frac{\frac{P(T=t, D^*=1|X, Z)P(C \geq t|X, Z, R=1)}{P(T=t, D^*=1|X, Z)P(C \geq t|X, Z)}}{\frac{P(T \geq t|X, Z)P(C \geq t|X, Z, R=1)}{P(T \geq t|X, Z)P(C \geq t|X, Z)}} \\
&= 1
\end{aligned}$$

such that the complete case analysis is valid.

## B. MULTIPLE IMPUTATION

### B.1 Gibbs sampler and prior choice

Multiple imputation as originally conceived consists of imputing missing data as draws from the posterior distribution of the missing data given the observed. This predictive distribution is based on a Bayesian model - i.e. a model for the full data plus specification of prior distributions for the model parameters. Most often the required posteriors are not available in closed form. In such cases, we can use Gibbs sampling to draw from the required posteriors, which involves repeatedly sampling from each of the fully conditional distributions (of parameters and missing data). In the present context, assuming independent priors for the parameters in each cause specific model, the Gibbs sampler consists of drawing from the following distributions at each iteration:

$$f(\beta_k, H_{0k}(\cdot)|y, d, z, x^{obs}, x^{mis}), k = 1, \dots, K$$

$$f(\phi|z, x^{obs}, x^{mis})$$

$$f(x^{mis}|y, d, z, \phi, \beta_1, H_{01}(\cdot), \dots, \beta_K, H_{0K}(\cdot))$$

where lower case letters denote the observed values of the corresponding random variables across all individuals, and  $x^{obs}$  and  $x^{mis}$  denote the observed and current imputations of  $X$  across all individuals.

As typically implemented, MI algorithms make use of non-informative priors for all model parameters. In the present context, we adopt improper flat priors for the regression coefficients  $\beta_k$ ,  $k = 1, \dots, K$ . If the cause specific baseline hazard functions are specified parametrically, then default non-informative priors can be chosen for the corresponding parameters. Often however one wishes to make no assumption about the baseline hazards, such that  $H_{0k}(\cdot)$ ,  $k = 1, \dots, K$  are infinite dimensional parameters.

In the simpler setting of single failure time data, [Chen and others \(2006\)](#) have developed theory for the propriety of the posterior distributions for the Cox model, including where some covariates are missing, based on using a gamma process prior for the (assumed arbitrary) cumulative baseline hazard function. Based on this they developed a Gibbs sampling algorithm for sampling from the required posterior distributions. In the same setting, [Bartlett and others \(2015\)](#) recently proposed a simpler Gibbs sampling scheme, in which at each iteration, first a new draw of  $\beta_1$  is sampled from a multivariate normal distribution with mean and covariance as given by Cox's partial likelihood. As shown by [Kalbfleisch \(1978\)](#), whose results were later extended by [Sinha and others \(2003\)](#), this approximate posterior for  $\beta_1$  can be justified by assuming a very diffuse gamma process prior on the cumulative baseline hazard. The algorithm proposed by [Bartlett and others \(2015\)](#) then updates the cumulative baseline hazard by calculating the usual Breslow estimator, conditional on the value of  $\beta_1$  sampled in the preceding step. This approach thus ignores uncertainty in the cumulative baseline hazard function. Nonetheless, in simulations, [Bartlett and others \(2015\)](#) obtained satisfactory confidence interval coverage for estimation of  $\beta_1$ .

We extend the approach described by [Bartlett and others \(2015\)](#) to the competing risks setting. Specifically, for each  $k = 1, \dots, K$ , we first draw  $\beta_k$  from an approximate multivariate normal posterior, with mean and covariance based on the corresponding partial likelihood. We then update  $H_{0k}(\cdot)$  using the Breslow estimator, conditioning on the drawn value of  $\beta_k$ . We explore the

finite sample performance of this approach, and in particular also investigate the performance for inferences about  $H_{0k}(\cdot)$ , in the simulation studies.

## B.2 Sampling methods

We now describe how missing values in  $X$  can be sampled, considering separately the case of categorical covariates and non-categorical covariates.

*Categorical covariates* If  $X$  has a finite sample space, we can directly sample from the imputation distribution. Specifically, let  $k$  be the constant of proportionality such that

$$P(X|Z, Y, D) = kf(Y, D|X, Z)P(X|Z)$$

Without loss of generality suppose that  $X$  has sample space  $\{1, \dots, S\}$ , such that

$$1 = \sum_{s=1}^S kf(Y, D|X = s, Z)P(X = s|Z)$$

Then we have

$$k = \frac{1}{\sum_{s=1}^S f(Y, D|X = s, Z)P(X = s|Z)}$$

and  $P(X = s'|Z, Y, D)$  is equal to

$$\begin{aligned} & \frac{f(Y, D|X = s', Z)P(X = s'|Z)}{\sum_{s=1}^S f(Y, D|X = s, Z)P(X = s|Z)} \\ &= \frac{\prod_{k=1}^K \exp[-\exp\{g_k(X = s', Z, \beta_k)\} H_{0k}(Y)] [\exp\{g_k(X = s', Z, \beta_k)\}]^{I(D=k)} P(X = s'|Z)}{\sum_{s=1}^S \prod_{k=1}^K \exp[-\exp\{g_k(X = s, Z, \beta_k)\} H_{0k}(Y)] [\exp\{g_k(X = s, Z, \beta_k)\}]^{I(D=k)} P(X = s|Z)} \end{aligned}$$

*Other covariate types* More generally, rejection sampling can be used to draw from the distribution, using  $f(X|Z)$  as the proposal distribution. To use rejection sampling the ratio of the target density to the proposal density must be bounded above, up to a constant of proportionality, by a quantity not involving  $X$ . From equation 3.1 of the main paper, here this ratio is simply equal to  $f(Y, D|X, Z)$ .

First suppose that  $D = 0$ , such that an individual is censored at time  $Y$ . Then we have  $f(Y, D = 0|X, Z) \leq S_0(Y|Z)h_0(Y|Z)$ . To sample a missing value of  $X^*$ , we sample from  $f(X|Z)$ , sample  $U \sim U(0, 1)$ , and accept  $X^*$  if

$$\begin{aligned} U &\leq \frac{f(Y, D = 0|X^*, Z)}{S_0(Y|Z)h_0(Y|Z)} \\ &= \prod_{k=1}^K \exp[-\exp\{g_k(X^*, Z, \beta_k)\} H_{0k}(Y)] \end{aligned}$$

Now suppose that  $D > 0$ . Then we have

$$\begin{aligned} f(Y, D|X, Z) &\leq S_0(Y|Z) \exp[-\exp\{g_D(X, Z, \beta_D)\} H_{0D}(Y)] h_{0D}(Y) \exp\{g_D(X, Z, \beta_D)\} \\ &= S_0(Y|Z)h_{0D}(Y) \exp[g_D(X, Z, \beta_D) - \exp\{g_D(X, Z, \beta_D)\} H_{0D}(Y)] \end{aligned}$$

Differentiation with respect to  $g_D()$  shows that the expression takes its maximum value when  $\exp\{g_D(X, Z, \beta_D)\} H_{0D}(Y) = 1$ , so that

$$f(Y, D|X, Z) \leq S_0(Y|Z)h_{0D}(Y) \frac{\exp(-1)}{H_{0D}(Y)}$$

To sample a missing value of  $X^*$ , we sample from  $f(X|Z)$ , sample  $U \sim U(0, 1)$ , and accept  $X^*$  if

$$\begin{aligned} U &\leq f(Y, D|X^*, Z) \frac{\exp(1)H_{0D}(Y)}{S_0(Y|Z)h_{0D}(Y)} \\ &= H_{0D}(Y) \exp\{1 + g_D(X^*, Z, \beta_D)\} \prod_{k=1}^K \exp[-\exp\{g_k(X^*, Z, \beta_k)\} H_{0k}(Y)] \end{aligned}$$

### B.3 Multiple missingness patterns

Here we describe the SMC-FCS algorithm in the case of multiple partially observed covariates and multiple missingness patterns. For each partially observed variable  $X_j$ , we specify a model  $f(X_j|X_{-j}, Z, \phi_j)$ , where  $X_{-j}$  denotes the components of  $X$  except the  $j$ th. Each iteration of the SMC-FCS algorithm then consists of sampling the missing values in  $X_j$ , for  $j = 1, \dots, p$ . To impute

the missing values in  $X_j$  we draw sequentially from:

$$\begin{aligned}
 & f(\beta_1, H_{01}(\cdot)|t, d, z, x^{obs}, x^{mis}) \\
 & \vdots \\
 & f(\beta_K, H_{0K}(\cdot)|t, d, z, x^{obs}, x^{mis}) \\
 & f(\phi_j|z, x^{obs}, x^{mis}) \\
 & f(x_j^{mis}|t, d, z, x_{-j}, \phi, \beta_1, H_{01}(\cdot), \dots, \beta_K, H_{0K}(\cdot))
 \end{aligned}$$

where  $x_{-j}$  denotes the current values of  $X_{-j}$  across all individuals, which consists of observed values and current imputed values.

## C. ADDITIONAL SIMULATIONS

### C.1 *Simulation 3 - missingness dependent on failure type*

In a third set of simulations (Table 1), we made values of  $X_3$  missing with probability  $0.2 + 0.3D$ , where  $D = 1, 2$  (failure due to cause 1, failure due to cause 2), leading to approximately 50% missing values. Such a mechanism could be induced if missingness in  $X_3$  was driven by an unobserved baseline variable  $V$ , which itself is an independent predictor of failure type. Here CCA is biased, since missingness is dependent on  $D$ . For the MI approaches, results were broadly similar to the first simulation set, except that the biases of the FCS approaches were smaller, leading to improved confidence interval coverage. Nonetheless, estimates of  $\beta_{13}$  remained biased using FCS accounting for competing risks (both with and without the additional interaction terms). In contrast, estimates based on SMC-FCS accounting for competing risks again led to unbiased estimates. Interestingly, SMC-FCS treating failures from the second cause as censoring events gave estimates for  $\beta_1$  with little bias, and confidence interval coverage fairly close to the nominal level.

### C.2 *Simulation 4 - covariate dependent MNAR*

Table 2 shows results from simulations where  $X_3$  was made missing with probability  $\expit(0.75X_3)$ , resulting in a covariate dependent MNAR mechanism. As expected CCA is unbiased, whereas the MI approaches, which assume MAR, are biased. Nevertheless, the biases in ‘SMC-FCS competing’ are arguably modest, with the exception being the cumulative baseline hazard function estimate at  $t = 0.5$ .

### C.3 *Simulation 5 - $X_3$ conditionally independent of hazard for second cause of failure*

Table 3 shows results from simulations where  $X_3$  was once again made missing (at random) with probability  $0.25 + 0.5X_1$ , but with  $\beta_2^T = (\beta_{21}, \beta_{22}, \beta_{23}) = (0.5, -1, 0)$ , such that the partially observed covariate  $X_3$  had no independent effect on the hazard from the second cause of failure. As expected, the ‘FCS competing’ and ‘FCS survival’ approaches now had similar performance, but they remained substantially biased for  $\beta_{13}$ , with zero coverage of confidence intervals for this parameter. Estimates based on ‘FCS competing int.’ as before had reduced bias, but estimates for  $\beta_{13}$  remained materially biased, and confidence interval coverage was low. SMC-FCS allowing for competing risks was again approximately unbiased with good confidence interval coverage, although the estimate of  $H_{01}(0.5)$  was biased upwards somewhat. As expected due to  $X_3$  having no independent effect on the second cause hazard, SMC-FCS treating failures from the second cause as censoring events led to unbiased estimates, and estimates for  $\beta_{23}$  that were more efficient than ‘SMC-FCS competing’, which here allowed for the possibility that  $\beta_{23} \neq 0$ . Confidence interval coverage for  $\beta_{23}$  from ‘SMC-FCS survival’ was above the nominal level, which is consistent with existing theory on the performance of Rubin’s variance estimator when the imputer makes an assumption (here that  $\beta_{23} = 0$ ) that the analyst does not (Meng (1994)).



## REFERENCES

- BARTLETT, J W, SEAMAN, S R, WHITE, I R AND CARPENTER, J R. (2015). Multiple imputation of covariates by fully conditional specification: Accommodating the substantive model. *Statistical Methods in Medical Research* **24**, 462–487.
- CHEN, M, IBRAHIM, J G AND SHAO, Q. (2006). Posterior propriety and computation for the Cox regression model with applications to missing covariates. *Biometrika* **93**, 791–807.
- KALBFLEISCH, J D. (1978). Non-parametric Bayesian analysis of survival time data. *Journal of the Royal Statistical Society B* **40**, 214–221.
- MENG, X L. (1994). Multiple-imputation inferences with uncongenial sources of input (with discussion). *Statistical Science* **10**, 538–573.
- SINHA, D, IBRAHIM, J G AND CHEN, M. (2003). A Bayesian justification of Cox’s partial likelihood. *Biometrika* **90**, 629–641.

Table 1. Mean (SD) of estimates across 1,000 simulations, with missingness dependent on failure indicator  
*D*. CI indicates empirical coverage of nominal 95% confidence intervals

| Method            | $\beta_{11} = 1$ | $\beta_{12} = 1$ | $\beta_{13} = 1$ | $\beta_{21} = 0.5$ | $\beta_{22} = -1$ | $\beta_{23} = 0.75$ | $\gamma = 1.25$ * |
|-------------------|------------------|------------------|------------------|--------------------|-------------------|---------------------|-------------------|
| Mean              |                  |                  |                  |                    |                   |                     |                   |
| Full data         | 1.00             | 1.01             | 1.01             | 0.51               | -1.00             | 0.75                | 1.24              |
| Complete case     | 0.98             | 0.84             | 1.02             | 0.55               | -1.38             | 0.86                | 1.85              |
| FCS competing     | 0.93             | 0.98             | 0.84             | 0.49               | -0.97             | 0.76                | 1.62              |
| FCS compet inter  | 0.98             | 1.05             | 0.90             | 0.51               | -1.03             | 0.76                | 1.35              |
| FCS survival      | 0.95             | 1.13             | 0.66             | 0.53               | -0.83             | 0.64                | 1.54              |
| SMC-FCS competing | 0.99             | 1.01             | 1.00             | 0.51               | -0.99             | 0.74                | 1.26              |
| SMC-FCS survival  | 0.95             | 1.00             | 1.05             | 0.80               | -0.56             | 0.28                | 1.28              |
| SD                |                  |                  |                  |                    |                   |                     |                   |
| Full data         | 0.13             | 0.14             | 0.07             | 0.11               | 0.11              | 0.05                | 0.26              |
| Complete case     | 0.14             | 0.16             | 0.08             | 0.23               | 0.24              | 0.10                | 0.45              |
| FCS competing     | 0.14             | 0.15             | 0.08             | 0.12               | 0.13              | 0.08                | 0.33              |
| FCS compet inter  | 0.13             | 0.15             | 0.08             | 0.12               | 0.14              | 0.08                | 0.28              |
| FCS survival      | 0.13             | 0.14             | 0.07             | 0.11               | 0.12              | 0.07                | 0.31              |
| SMC-FCS competing | 0.14             | 0.15             | 0.09             | 0.12               | 0.14              | 0.08                | 0.28              |
| SMC-FCS survival  | 0.14             | 0.16             | 0.09             | 0.10               | 0.11              | 0.04                | 0.29              |
| Coverage          |                  |                  |                  |                    |                   |                     |                   |
| Full data         | 96               | 95               | 93               | 97                 | 95                | 95                  | 94                |
| Complete case     | 96               | 83               | 94               | 95                 | 60                | 82                  | 84                |
| FCS competing     | 95               | 96               | 73               | 96                 | 95                | 94                  | 93                |
| FCS compet inter  | 97               | 95               | 85               | 96                 | 94                | 94                  | 97                |
| FCS survival      | 95               | 88               | 7                | 96                 | 77                | 71                  | 93                |
| SMC-FCS competing | 97               | 94               | 95               | 96                 | 94                | 94                  | 94                |
| SMC-FCS survival  | 94               | 96               | 90               | 23                 | 3                 | 0                   | 94                |

\* $\gamma = 100 \times H_{01}(0.5) = 1.25$

Table 2. Mean (SD) of estimates across 1,000 simulations, with missingness in  $X_3$  dependent on  $X_3$ . CI indicates empirical coverage of nominal 95% confidence intervals

| Method            | $\beta_{11} = 1$ | $\beta_{12} = 1$ | $\beta_{13} = 1$ | $\beta_{21} = 0.5$ | $\beta_{22} = -1$ | $\beta_{23} = 0.75$ | $\gamma = 1.25$ * |
|-------------------|------------------|------------------|------------------|--------------------|-------------------|---------------------|-------------------|
|                   | Mean             |                  |                  |                    |                   |                     |                   |
| Full data         | 1.00             | 1.02             | 1.00             | 0.51               | -1.00             | 0.75                | 1.23              |
| Complete case     | 1.00             | 1.02             | 1.01             | 0.50               | -1.01             | 0.76                | 1.22              |
| FCS competing     | 0.93             | 1.08             | 0.70             | 0.58               | -0.83             | 0.63                | 1.94              |
| FCS compet inter  | 0.97             | 1.10             | 0.81             | 0.57               | -0.89             | 0.66                | 1.70              |
| FCS survival      | 0.95             | 1.14             | 0.61             | 0.61               | -0.75             | 0.55                | 1.88              |
| SMC-FCS competing | 0.99             | 1.06             | 0.95             | 0.57               | -0.89             | 0.68                | 1.59              |
| SMC-FCS survival  | 0.94             | 1.08             | 1.00             | 0.78               | -0.57             | 0.33                | 1.43              |
|                   | SD               |                  |                  |                    |                   |                     |                   |
| Full data         | 0.13             | 0.14             | 0.07             | 0.11               | 0.11              | 0.05                | 0.25              |
| Complete case     | 0.18             | 0.18             | 0.10             | 0.16               | 0.17              | 0.08                | 0.39              |
| FCS competing     | 0.13             | 0.14             | 0.08             | 0.12               | 0.12              | 0.08                | 0.38              |
| FCS compet inter  | 0.14             | 0.14             | 0.08             | 0.12               | 0.13              | 0.08                | 0.34              |
| FCS survival      | 0.13             | 0.14             | 0.07             | 0.12               | 0.11              | 0.07                | 0.37              |
| SMC-FCS competing | 0.14             | 0.15             | 0.10             | 0.12               | 0.13              | 0.08                | 0.34              |
| SMC-FCS survival  | 0.15             | 0.15             | 0.10             | 0.10               | 0.10              | 0.04                | 0.31              |
|                   | Coverage         |                  |                  |                    |                   |                     |                   |
| Full data         | 94               | 94               | 95               | 96                 | 95                | 95                  | 94                |
| Complete case     | 95               | 95               | 94               | 96                 | 95                | 95                  | 91                |
| FCS competing     | 94               | 93               | 15               | 91                 | 74                | 67                  | 67                |
| FCS compet inter  | 96               | 91               | 51               | 90                 | 86                | 79                  | 88                |
| FCS survival      | 94               | 88               | 2                | 85                 | 50                | 28                  | 71                |
| SMC-FCS competing | 94               | 93               | 89               | 92                 | 88                | 83                  | 92                |
| SMC-FCS survival  | 91               | 91               | 94               | 32                 | 3                 | 0                   | 96                |

\* $\gamma = 100 \times H_{01}(0.5) = 1.25$

Table 3. Mean (SD) of estimates across 1,000 simulations, with hazard of second cause (conditionally) independent of  $X_3$ . CI indicates empirical coverage of nominal 95% confidence intervals

| Method            | $\beta_{11} = 1$ | $\beta_{12} = 1$ | $\beta_{13} = 1$ | $\beta_{21} = 0.5$ | $\beta_{22} = -1$ | $\beta_{23} = 0$ | $\gamma = 1.25^*$ |
|-------------------|------------------|------------------|------------------|--------------------|-------------------|------------------|-------------------|
|                   | Mean             |                  |                  |                    |                   |                  |                   |
| Full data         | 1.00             | 1.00             | 1.00             | 0.50               | -1.00             | 0.00             | 1.27              |
| Complete case     | 1.00             | 1.00             | 1.01             | 0.51               | -1.01             | 0.00             | 1.26              |
| FCS competing     | 0.88             | 1.02             | 0.52             | 0.57               | -0.94             | -0.07            | 2.42              |
| FCS compet inter  | 1.01             | 0.98             | 0.72             | 0.50               | -1.01             | 0.01             | 1.78              |
| FCS survival      | 0.88             | 1.03             | 0.52             | 0.57               | -0.94             | -0.07            | 2.42              |
| SMC-FCS competing | 1.03             | 1.00             | 0.99             | 0.50               | -1.00             | 0.00             | 1.32              |
| SMC-FCS survival  | 1.04             | 1.00             | 1.00             | 0.50               | -1.00             | 0.00             | 1.29              |
|                   | SD               |                  |                  |                    |                   |                  |                   |
| Full data         | 0.13             | 0.14             | 0.06             | 0.11               | 0.12              | 0.05             | 0.25              |
| Complete case     | 0.20             | 0.19             | 0.10             | 0.18               | 0.17              | 0.06             | 0.38              |
| FCS competing     | 0.15             | 0.14             | 0.06             | 0.12               | 0.12              | 0.06             | 0.43              |
| FCS compet inter  | 0.16             | 0.15             | 0.06             | 0.11               | 0.13              | 0.06             | 0.35              |
| FCS survival      | 0.15             | 0.14             | 0.06             | 0.12               | 0.12              | 0.06             | 0.43              |
| SMC-FCS competing | 0.17             | 0.17             | 0.10             | 0.11               | 0.12              | 0.06             | 0.33              |
| SMC-FCS survival  | 0.17             | 0.16             | 0.09             | 0.10               | 0.11              | 0.04             | 0.31              |
|                   | Coverage         |                  |                  |                    |                   |                  |                   |
| Full data         | 96               | 94               | 95               | 96                 | 94                | 93               | 95                |
| Complete case     | 96               | 94               | 94               | 94                 | 94                | 94               | 93                |
| FCS competing     | 91               | 96               | 0                | 92                 | 91                | 80               | 17                |
| FCS compet inter  | 97               | 96               | 17               | 95                 | 95                | 94               | 87                |
| FCS survival      | 90               | 97               | 0                | 92                 | 92                | 82               | 18                |
| SMC-FCS competing | 95               | 95               | 96               | 96                 | 94                | 94               | 94                |
| SMC-FCS survival  | 94               | 95               | 95               | 96                 | 96                | 99               | 94                |

\* $\gamma = 100 \times H_{01}(0.5) = 1.25$
